# Supplementary material for: Ferrocenophanium Stability and Catalysis
Source: MDPI journal article supplement (doi:10.3390/molecules28062729), 2023-03-17
Supplement: s1 [file s1]

# Ferrocenophanium Stability and Catalysis

Sai Anvesh Bezawada, Neira Ušto, Chloe Wilke, Michael Barnes-Flaspoler, Rajamoni Jagan  
and Eike B. Bauer\*

University of Missouri - St. Louis, Department of Chemistry and Biochemistry, One  
University Boulevard, St. Louis, MO 63121, USA; Tel.: +1 (314) 516-5311; Fax: +1 (314)  
516-5342; [bauere@umsl.edu](mailto:bauere@umsl.edu).

## Supplementary Information

### Table of Content

|                                                                                                                 |     |
|-----------------------------------------------------------------------------------------------------------------|-----|
| General Section, ferrocenophanium syntheses .....                                                               | S2  |
| X-Ray structure determination Table S1 and<br>Figures S1 and S2 .....                                           | S3  |
| Plots of $i_{\max}$ vs the square root of the scan rate .....                                                   | S5  |
| Synthesis of Catalysis Products in Table 2 .....                                                                | S6  |
| IR spectra of <b>1</b> <sup>+</sup> SbF <sub>6</sub> (top) and <b>2</b> <sup>+</sup> SbF <sub>6</sub> .....     | S8  |
| UV-vis spectra of <b>1</b> <sup>+</sup> SbF <sub>6</sub> (top) and <b>2</b> <sup>+</sup> SbF <sub>6</sub> ..... | S9  |
| NMR Spectra of catalysis products .....                                                                         | S10 |
| References .....                                                                                                | S12 |

## General experimental procedures

Chemicals (*n*-Bu<sub>4</sub>PF<sub>6</sub>, ferrocene, phenyl methyl propargylic alcohol **3**, AgSbF<sub>6</sub>, Celite®) were purchased from and Sigma Aldrich and were used without any further purification. Dry solvents were obtained by standard distillation procedures. Column chromatography was performed with silica gel 60 (70-230 mesh) or aluminAR® (Mallinckrodt). <sup>1</sup>H NMR spectra were recorded in CDCl<sub>3</sub> using a Bruker instrument (300 MHz) and referenced to a residual solvent signal.

Ketoferrocenophane **1** and Ferrocenophane **2** were synthesized according to the literature [1,2]. The propargylic alcohols **7** [3] and **9** [4] were synthesized according to the literature. The NMR spectra of the catalysis products matched those in the literature [5,6].

### *Synthesis of ketoferrocenophanium hexafluoroantimonate [7], 1<sup>+</sup>SbF<sub>6</sub>*

Silver hexafluoroantimonate (AgSbF<sub>6</sub>, 0.272 g, 0.00079 mol) was added to a solution of the ketoferrocenophane **1** (0.190 g, 0.00079 mol) in diethyl ether (15 mL). The reaction was run for 1 hour under nitrogen in the dark. The reaction mixture was then filtered through Celite® under a nitrogen atmosphere and the solvent is removed under vacuum to obtain the product 1<sup>+</sup>SbF<sub>6</sub> as a dark blue solid (0.28 g, 0.00059 mol, 74%). IR (ATR, neat):  $\tilde{\nu}$  = 3112 (m), 2962 (m), 1692 (m), 1618 (m) cm<sup>-1</sup>; UV-vis (CH<sub>2</sub>Cl<sub>2</sub>) [8]:  $\lambda_{\text{max}}$  ( $\epsilon$ ) = 632 nm (554 M<sup>-1</sup> cm<sup>-1</sup>).

### *Synthesis of ferrocenophanium hexafluoroantimonate [9], 2<sup>+</sup>SbF<sub>6</sub>*

The ferrocenophanium hexafluoroantimonate 2<sup>+</sup>SbF<sub>6</sub> was obtained using the same procedure than for 1<sup>+</sup>SbF<sub>6</sub> in virtual quantitative yield. IR (ATR, neat):  $\tilde{\nu}$  = 3114 (m), 2904 (m), 1633 (m) cm<sup>-1</sup>; UV-vis (CH<sub>2</sub>Cl<sub>2</sub>) [8]:  $\lambda_{\text{max}}$  ( $\epsilon$ ) = 623 nm (456 M<sup>-1</sup> cm<sup>-1</sup>).

### Single crystal data collection

Good diffraction quality crystals of  $1^+\text{SbF}_6$  were obtained directly from the reaction product, of which a suitable shaped crystal of size  $0.08 \times 0.05 \times 0.02$  mm was chosen for X-Ray diffraction experiment. Intensity data of the crystal was collected using Bruker D8 Venture Photon II Diffractometer equipped with micro-focus sealed tube (Cu-source) of wavelength  $1.54178 \text{ \AA}$ . Correct unit-cell parameters were determined by collecting data from 60 frames in three different crystallographic zones followed by data collection with exposure time of 10s per frame and scan width of  $0.5^\circ$ . Data reduction, scaling and multi-scan absorption correction were carried out using SAINT-plus and SADABS in APEX3 software [10]. The crystal structure was solved by direct methods procedure using the SHELXS program [11] and refined by Full-matrix least squares procedure on F<sup>2</sup> using the SHELXL-2018 program [12]. The intensity data was checked for missing symmetry elements and Twinning with the PLATON program [12] Hydrogen atoms were placed in geometrically idealised positions and constrained to ride on their parent atoms with C–H distances in the range 0.93-0.97(Å). Isotropic thermal parameters ( $U_{\text{eq}}$ ) were fixed such that they were  $U_{\text{iso}}(\text{H}) = 1.5U_{\text{eq}}(\text{C})$  for aromatic C–H group and  $U_{\text{iso}}(\text{H}) = 1.2U_{\text{eq}}(\text{C})$  for methylene group respectively. The molecular graphics images of the molecules were drawn using OLEX2 [13] and Mercury 3.9 software [14]. The crystal structure refinement details are summarized in Table 1.

**Table S1:** Intermolecular interaction geometries of  $1^+\text{SbF}_6$ .

| D-H...A       | D-H (Å) | H...A(Å) | D-H...A(°) | Symmetry operation  |
|---------------|---------|----------|------------|---------------------|
| C10–H10...O1  | 0.93    | 2.41     | 3.215(10)  | $x, 1/2-y, -1/2+y$  |
| C12–H12A...O1 | 0.97    | 2.37     | 3.270(11)  | $x, 1/2-y, -1/2+y$  |
| C3–H3...F3    | 0.93    | 2.57     | 3.179(11)  | $x, 1/2-y, -1/2+y$  |
| C5–H5...F1    | 0.93    | 2.64     | 3.425(10)  | $1+x, 1/2-y, 1/2+y$ |
| C7–H7...F3    | 0.93    | 2.37     | 3.281(13)  | $1-x, 1/2+y, 1/2-z$ |

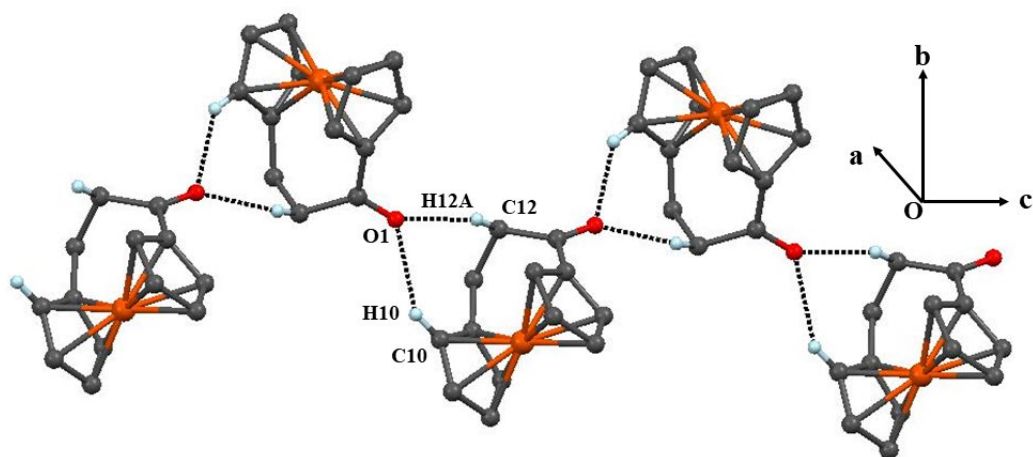

**Figure S1:** Part of the crystal structure of  $1^+\text{SbF}_6^-$  showing the formation of one-dimensional [3] ferrocenophan-1-one supramolecular chain via C–H...O interaction extending along the crystallographic [0 0 1] direction. The hydrogen atoms not involved in the hydrogen bonds are omitted for clarity.

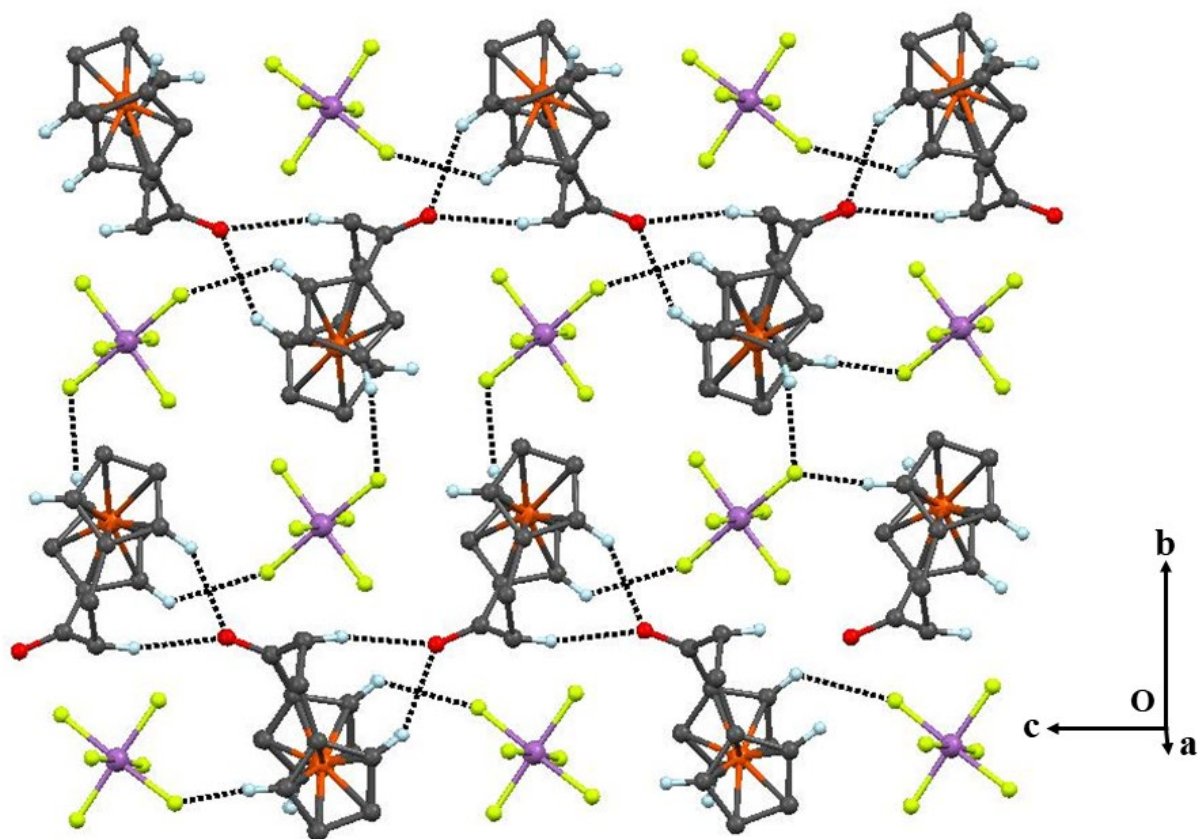

**Figure S2:** Molecular packing of the crystal viewed along the a-axis showing the formation of C–H...O and C–H...F interaction. The hydrogen atoms not involved in the hydrogen bonds are omitted for clarity.

## Cyclic Voltammetry Traces – $i_{\max}$ vs $\sqrt{v}$ ( $v = \text{scan rate}$ )

A plot of the  $i_{\max}$  value vs square root of the scan rate gives linear graphs, as expected for a diffusion-controlled electron transfer.

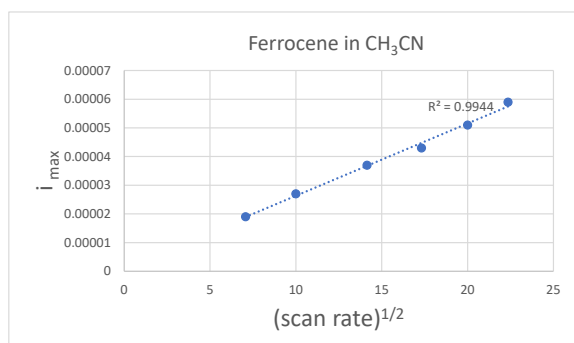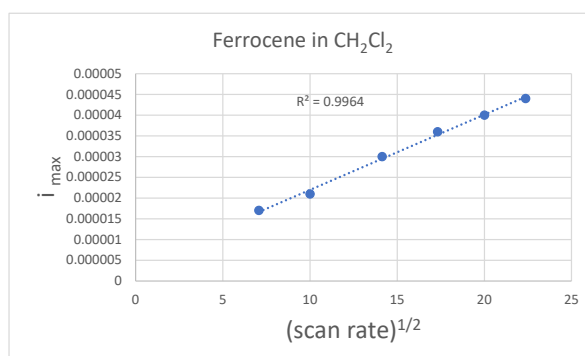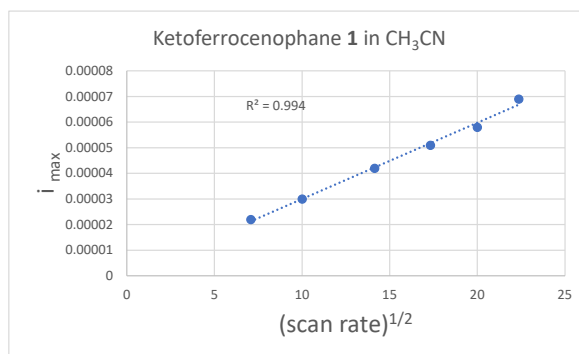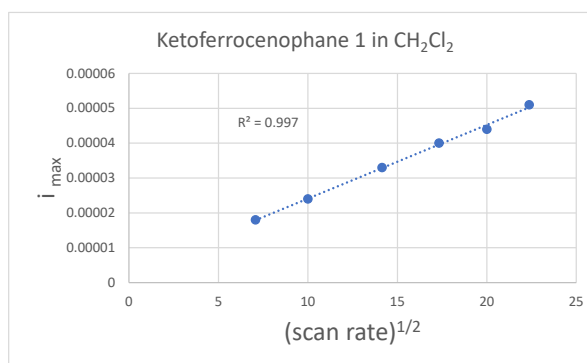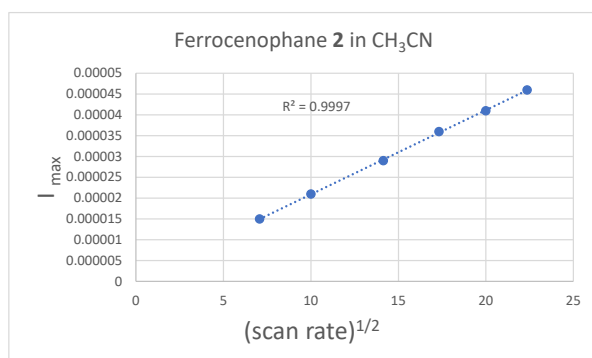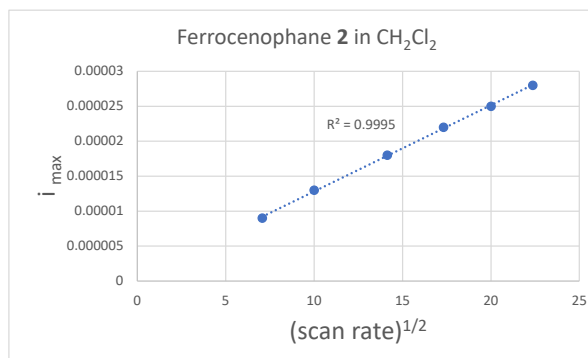

## Experimental Section Catalysis (Table 5)

*Phenyl-methyl-n-butyl ether (5)* [6]: In a screw cap pressure vial, 1-phenyl-1-methyl-2-yn-1-ol (0.15 g, 1.06 mmol) was dissolved in CH<sub>2</sub>Cl<sub>2</sub> (2 mL). *n*-butanol (0.075 g, 1 mmol) and the catalysts **1**<sup>+</sup>SbF<sub>6</sub> or **2**<sup>+</sup>SbF<sub>6</sub> (0.032 mmol) were added, and the vial was sealed and left at 45 °C for 4 h to 18 h. The reaction mixture was filtered through a short pad of silica gel with CH<sub>2</sub>Cl<sub>2</sub> (2 mL) and the reaction was isolated by column chromatography using hexanes / ethyl acetate v:v 1:1; no appreciable amount of the product **5** could be isolated.

*Ene-yne butyl ether (7)* [5]: In a screw cap pressure vial, 1-phenyl-1-cyclopropyl-2-yn-1-ol (**6**, 0.05 g, 0.29 mmol) was dissolved in CH<sub>2</sub>Cl<sub>2</sub> (2 mL). *n*-Butanol (0.02 g, 0.29 mmol) and the ketoferrocenophanium complex (**1**<sup>+</sup>SbF<sub>6</sub>, 0.007 g, 0.015 mmol) were added, and the vial was sealed and heated at 45 °C for 2 hours. The reaction mixture was filtered through silica gel, using CH<sub>2</sub>Cl<sub>2</sub> (2–4 mL). The product was obtained by column chromatography on alumina (2.5 × 30 cm, 9:1 v/v hexanes : ethyl acetate) as a yellow colored oil (0.009 g, 0.037 mmol, 13%). <sup>1</sup>H NMR (300 MHz, CDCl<sub>3</sub>): δ = 7.54–7.51 (m, 2H, aromatic), 7.29–7.18 (m, 3H, aromatic), 6.51–6.46 (t, 1H, *J*<sub>HH</sub>=7 Hz, =CH), 3.52 (t, *J*<sub>HH</sub>=7 Hz, 2H, OCH<sub>2</sub>), 3.48 (t, 2H, *J*<sub>HH</sub>=7 Hz, OCH<sub>2</sub>), 3.27 (s, 1H, ≡CH), 2.79 (q, *J*<sub>HH</sub>=7 Hz, 2H, CH<sub>2</sub>), 1.55–1.45 (m, 2H, CH<sub>2</sub>), 1.36–1.27 (m, 2H, CH<sub>2</sub>), 0.85 (t, 3H, *J*<sub>HH</sub>=7 Hz, CH<sub>3</sub>) ppm.

*Ene-yne butyl ether (7)* [5]: 1-phenyl-1-cyclopropyl-2-yn-1-ol (**6**, 0.1 g, 0.58 mmol) was added to a 5-mL screw cap vial and dissolved in CH<sub>2</sub>Cl<sub>2</sub> (1 mL). *n*-Butanol (0.043 g, 0.58 mmol) was added followed by the addition of the ferrocenophanium complex (**2**<sup>+</sup>SbF<sub>6</sub>, 0.01 g, 0.03 mmol). The vial was then sealed and heated at 45 °C for 15 minutes. The sample was filtered through a short pad of silica and the solvent was removed. The reaction mixture was chromatographed on an alumina column (hexanes / ethyl acetate v:v 4:1) to obtain the product as a yellow oil (0.051 g, 0.254 mmol, 44%)

$^1\text{H}$  NMR (300 MHz,  $\text{CDCl}_3$ ):  $\delta$  = 7.53–7.51 (m, 2H, aromatic), 7.28–7.18 (m, 3H, aromatic), 6.50–6.45 (t, 1H,  $J_{\text{HH}}=7$  Hz, =CH), 3.57–3.52 (t,  $J_{\text{HH}}=7$  Hz, 2H,  $\text{OCH}_2$ ), 3.47–3.35 (t, 2H,  $J_{\text{HH}}=7$  Hz,  $\text{OCH}_2$ ), 3.28 (s, 1H,  $\equiv\text{CH}$ ), 2.72–2.67 (q,  $J_{\text{HH}}=7$  Hz, 2H,  $\text{CH}_2$ ), 1.51–1.44 (m, 2H,  $\text{CH}_2$ ), 1.33–1.26 (m, 2H,  $\text{CH}_2$ ), 0.87–0.82 (t, 3H,  $J_{\text{HH}}=7$  Hz,  $\text{CH}_3$ ) ppm.

*Cyclopropyl thiophenyl butyl ether* (**9**) [5]: In a screw-cap pressure vial, 1-thiophen-1-cyclopropyl-2-yne-1-ol (**8**, 0.050 g, 0.28 mmol) was dissolved in  $\text{CH}_2\text{Cl}_2$  (1 mL) and *n*-butanol (0.020 g, 0.28 mmol) and the ferrocenophanium complex (**2** $^+\text{SbF}_6$ , 0.005 g, 0.070 mmol) were added. Then the vial was heated at 45 °C overnight. The product was filtered through a short pad of silica gel using  $\text{CH}_2\text{Cl}_2$  (2–4 mL). The product 1-thiophen-1-cyclopropyl-2-yne-1-ol (**9**) was obtained by column chromatography on alumina (2.5  $\times$  30 cm, 9:1 v/v hexanes : EtOAc) as an orange colored oil (0.004 g, 0.016 mmol, 6%).  $^1\text{H}$  NMR (300 MHz,  $\text{CDCl}_3$ ):  $\delta$  = 7.21–7.19 (m, 2H, aromatic), 7.13–7.12 (m, 1 H, aromatic) 6.89–6.87 (m, 1H, aromatic), 3.60 (dd, 1H,  $J_{\text{HH}} = 6$  Hz,  $J_{\text{HH}} = 2$  Hz,  $\text{OCHH}'$ ), 3.25 (dd, 1H,  $J_{\text{HH}} = 6$  Hz,  $J_{\text{HH}} = 2$  Hz,  $\text{OCHH}'$ ), 2.53 (s, 1H,  $\equiv\text{CH}$ ), 1.49–1.27 (m, 3H,  $\text{CH}+\text{CH}_2$ ), 1.24–1.18 (m, 5H, CH), 0.83–0.78 (m, 6H, CH), 0.54–0.51 (m, 3H) ppm.

## IR spectra of $1^+\text{SbF}_6$ (top) and $2^+\text{SbF}_6$

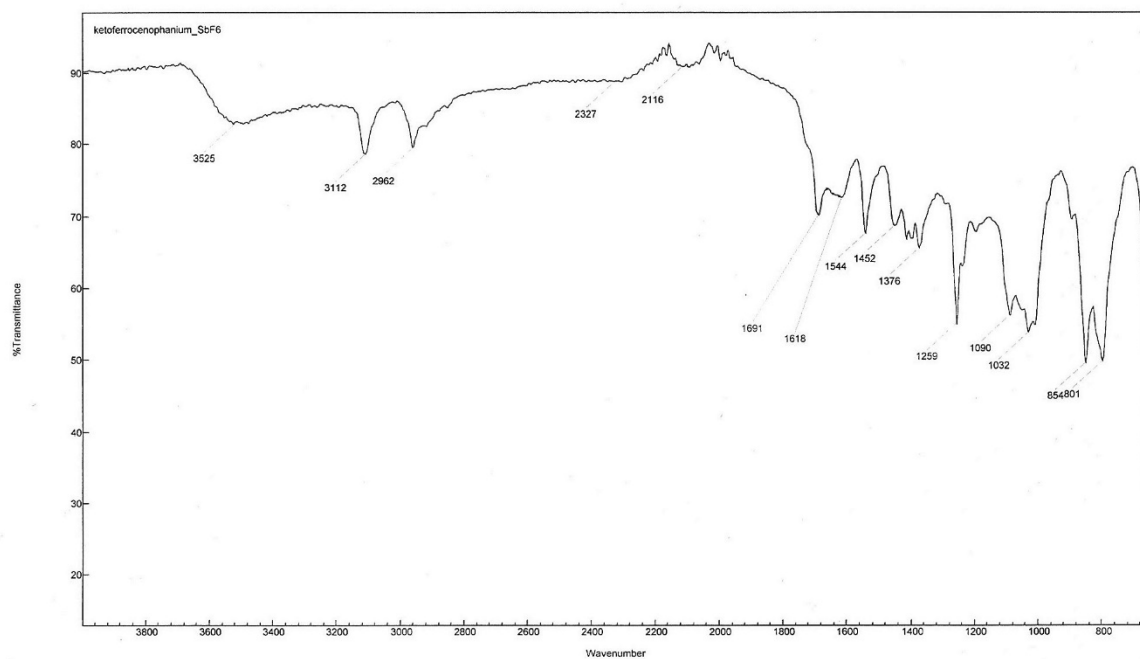

Name  
ketoferrocenophanium\_SbF6

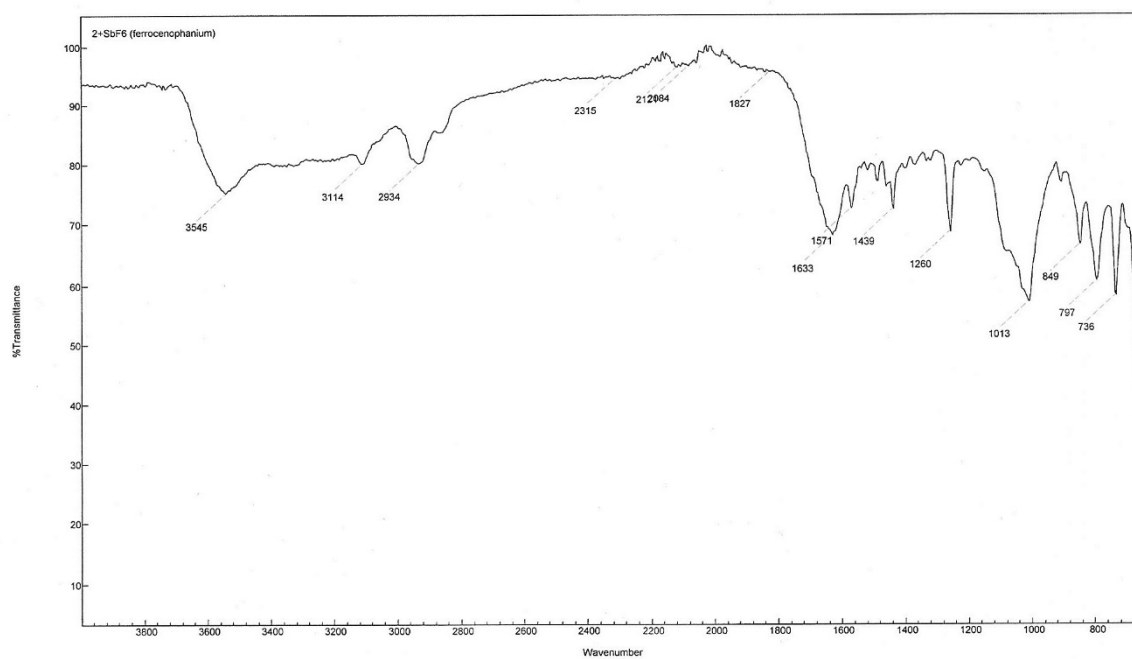

Name  
2+SbF6 (ferrocenophanium)



UV-vis spectra of  $1^+\text{SbF}_6$  (top) and  $2^+\text{SbF}_6$

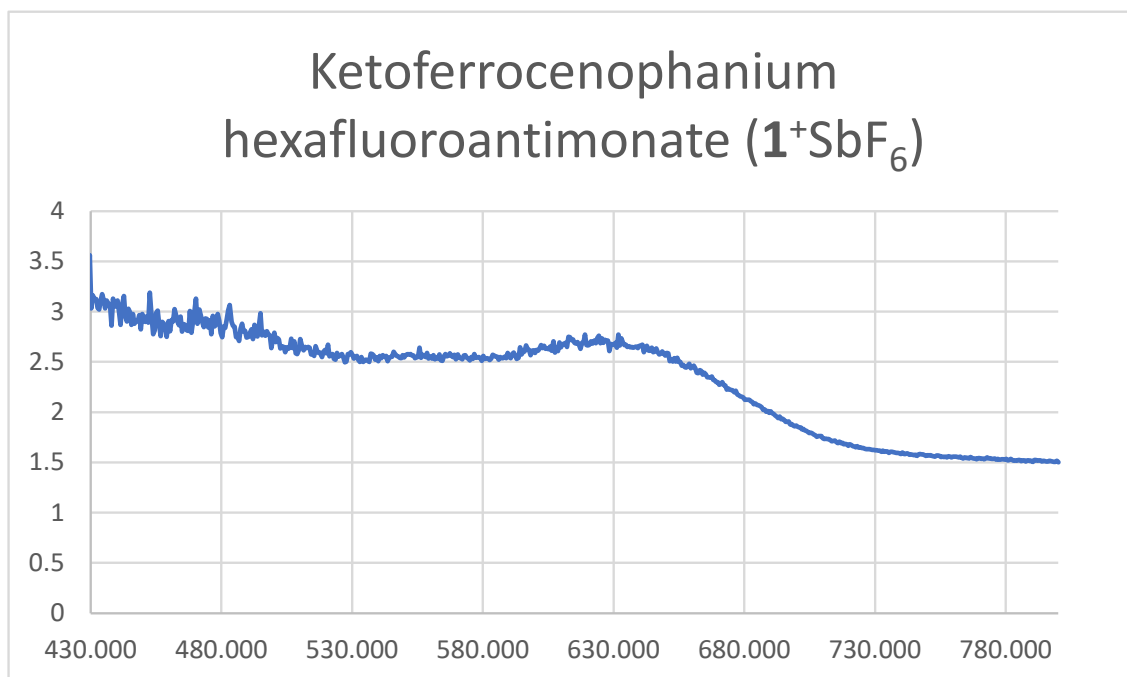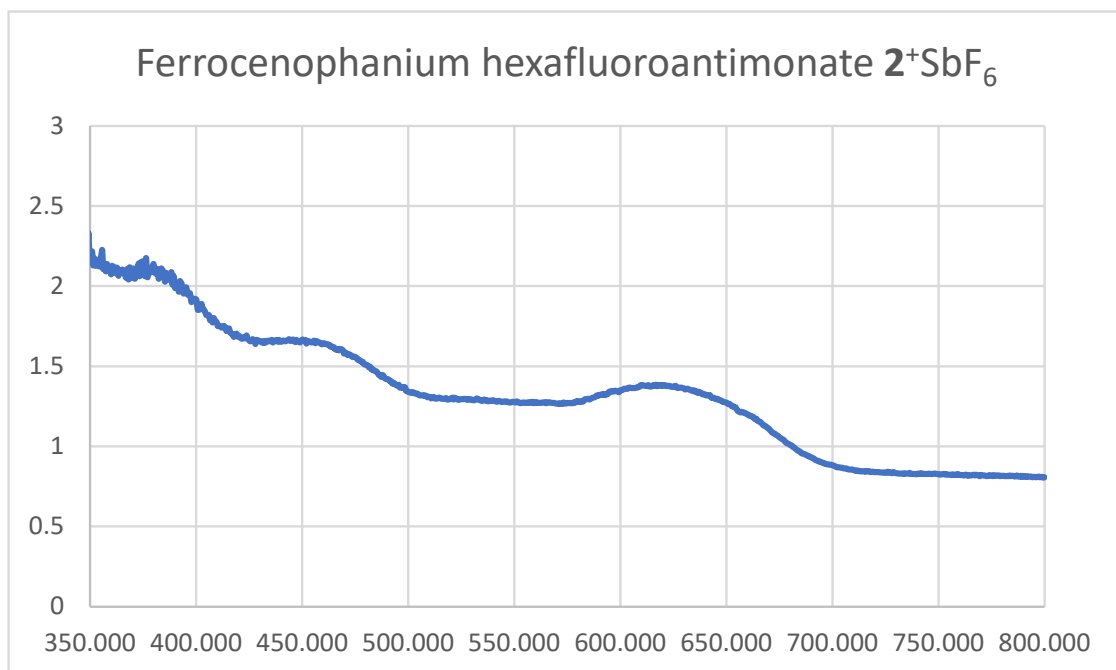

**Table 5, compound 7.** Employing the ketoferrocenophanium **1**<sup>+</sup> (top) and ferrocenophanium **2**<sup>+</sup> catalyst.

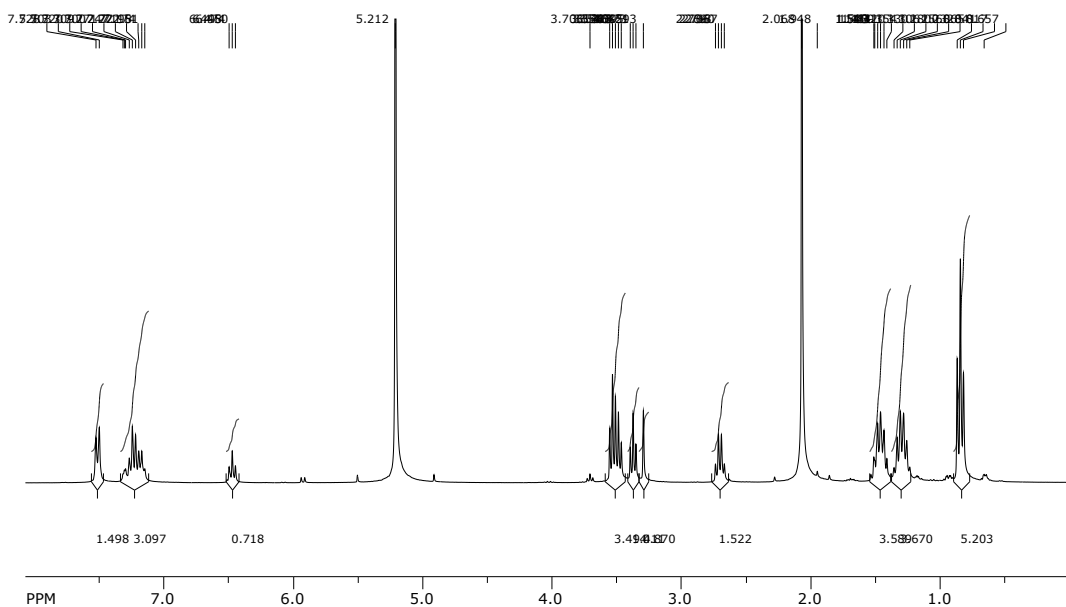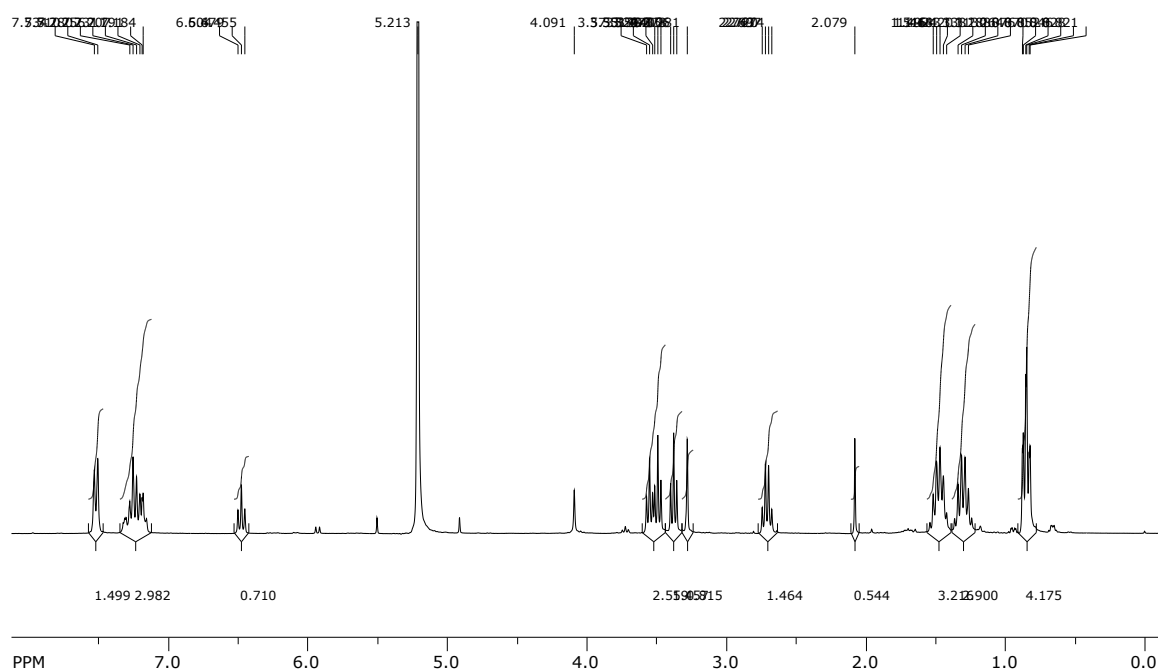

**Table 5, compound 9.** Employing the ferrocenophanium **2**<sup>+</sup> catalyst.

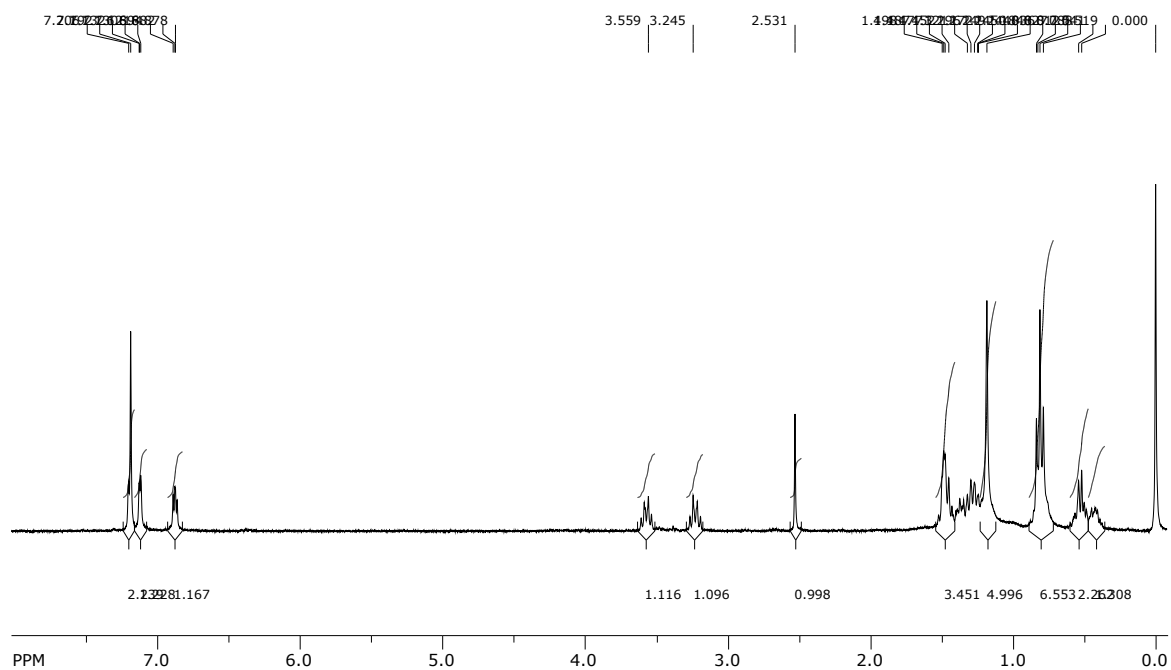

## References

- 1 Turbitt, T. D.; Watts, W. E. Bridged ferrocenes: XII. The synthesis of [3] ferrocenophan-1-one from ferrocene by a novel one-step annelation reaction. *J. Organomet. Chem.* **1972**, *46*, 109–117.
- 2 Dong, T.-Y.; Lee, S. H. The effects of an interannular bridge on the electronic structure of ferrocenium cations *J. Organomet. Chem.* **1996**, *487*, 77–88.
- 3 Rao, W. Zhang, X.; Sze, E. M. L.; Chan, P. W. H. Ytterbium(III) Triflate-Catalyzed Amination of 1-Cyclopropylprop-2-yn-1-ols as an Expedient Route to Conjugated Enynes. *J. Org. Chem.* **2009**, *74*, 1740–1743.
- 4 Yamauchi, Y.; Onodera, G.; Sakata, K.; Yuki, M.; Miyake, Y.; Uemura, S.; Nishibayashi, Y. Ruthenium-Catalyzed Reactions of 1-Cyclopropyl-2-propyn-1-ols with Anilines and Water via Allenylidene Intermediates: Selective Preparation of Tri- and Tetrasubstituted Conjugated Enynes. *J. Am. Chem. Soc.* **2007**, *129*, 5175–5179.
- 5 Talasila, D. S.; Queensen, M. J.; Barnes-Flaspolder, M.; Jurkowski, K.; Stephenson, E.; Rabus, J. M.; Bauer, E. B. Ferrocenium Cations as Catalysts for the Etherification of Cyclopropyl-Substituted Propargylic Alcohols: Ene-yne Formation and Mechanistic Insights. *Eur. J. Org. Chem.* **2019**, 7348–7358.
- 6 Queensen, M. Q.; Rabus, J. M.; Bauer, E. B. Ferrocenium hexafluorophosphate as an inexpensive, mild catalyst for the etherification of propargylic alcohols. *J. Mol. Cat. A: Chem* **2015**, *407*, 221–229.
- 7 Carty, P.; Dove, M. F. A. The reaction of some ferrocenyl ketones with anhydrous silver tetrafluoroborate, a new route to substituted ferricenium salts. *J. Organomet. Chem.* **1971**, *28*, 125–132.
- 8 Watanabe, M.; Sato, K.; Motoyama, I.; Sano, H. Mössbauer Studies of Bridged Ferrocenophane Derivative's Polyiodides. *Chemistry Letters* **1983**, 1775–1778.
- 9 Duggani, D.M.; Hendrickson, D.N. Electronic structure of various ferricenium systems as inferred from Raman, infrared, low temperature electronic absorption, and electron paramagnetic resonance measurements. *Inorg. Chem.* **1975**, *14*, 955–970.
- 10 Bruker, APEX3, SAINT-Plus and SADABS (2016). Bruker AXS Inc., Madison, Wisconsin, USA.

- 11 Sheldrick, G. M. Crystal structure refinement with SHELXL. *Acta. Cryst.* **2015**, *C71*, 3–8.
- 12 Spek, A. L. checkCIF validation ALERTS: what they mean and how to respond. *Acta Cryst.* **2020**, *E76*, 1–11.
- 13 Dolomanov, O.V.; Bourhis, L.J.; Gildea, R.J.; Howard, J.A.K.; Puschmann, H. OLEX2: a complete structure solution, refinement and analysis program. *J. Appl. Cryst.* **2009**, *42*, 339–341.
- 14 Macrae, C. F.; Bruno, I. J.; Chisholm, J. A.; Edgington, P. R.; McCabe, P.; Pidcock, E.; Rodriguez-Monge, L.; Taylor, R.; van de Streek, J.; Wood, P. A. Mercury 4.0: from visualization to analysis, design and prediction. *J. Appl. Crystallogr.* **2009**, *41*, 466–470.
